# Supplementary material for: Prognostic Role of the Ubiquitin Proteasome System in Clear Cell Renal Cell Carcinoma: A Bioinformatic Perspective
Source: PubMed Central journal article supplement (PMC8176417; doi:10.7150/jca.53760), 2021-05-13
Supplement: jcav12p4134s1.pdf [file jcav12p4134s1.pdf]

**Table S1.** Set of 676 ubiquitin proteasome system related genes

| Categories                          | Genes                                                                                                                                                                                                                                                                                                                                                                                                                                                                                                                                                                                                                                                                                                                                                                                                                                                                                                                                                                                                                                                                                                                                                                                                                                                                                                                                                                                                                                                                                                                                                                                                                                                                                                                                                                                                                                                                                                                                                                                                                                                                                                                       |
|-------------------------------------|-----------------------------------------------------------------------------------------------------------------------------------------------------------------------------------------------------------------------------------------------------------------------------------------------------------------------------------------------------------------------------------------------------------------------------------------------------------------------------------------------------------------------------------------------------------------------------------------------------------------------------------------------------------------------------------------------------------------------------------------------------------------------------------------------------------------------------------------------------------------------------------------------------------------------------------------------------------------------------------------------------------------------------------------------------------------------------------------------------------------------------------------------------------------------------------------------------------------------------------------------------------------------------------------------------------------------------------------------------------------------------------------------------------------------------------------------------------------------------------------------------------------------------------------------------------------------------------------------------------------------------------------------------------------------------------------------------------------------------------------------------------------------------------------------------------------------------------------------------------------------------------------------------------------------------------------------------------------------------------------------------------------------------------------------------------------------------------------------------------------------------|
| Ubiquitin                           | RPS27A, UBA52, UBB, UBC                                                                                                                                                                                                                                                                                                                                                                                                                                                                                                                                                                                                                                                                                                                                                                                                                                                                                                                                                                                                                                                                                                                                                                                                                                                                                                                                                                                                                                                                                                                                                                                                                                                                                                                                                                                                                                                                                                                                                                                                                                                                                                     |
| Ubiquitin activating enzymes (E1s)  | UBA1, UBA6                                                                                                                                                                                                                                                                                                                                                                                                                                                                                                                                                                                                                                                                                                                                                                                                                                                                                                                                                                                                                                                                                                                                                                                                                                                                                                                                                                                                                                                                                                                                                                                                                                                                                                                                                                                                                                                                                                                                                                                                                                                                                                                  |
| Ubiquitin conjugating enzymes (E2s) | UBE2A, UBE2B, UBE2C, UBE2D1, UBE2D2, UBE2D3, UBE2D4, UBE2E1, UBE2E2, UBE2E3, UBE2G1, UBE2G2, UBE2H, UBE2J1, UBE2J2, UBE2K, UBE2L3, UBE2N, UBE2NL, UBE2O, UBE2Q1, UBE2Q2, UBE2QL, UBE2R1, UBE2R2, UBE2S, UBE2T, UBE2U, UBE2V1, UBE2V2, UBE2W, BIRC6, UBE2F, UBE2I, UBE2L6, UBE2M, UBE2Z, ATG10, ATG3                                                                                                                                                                                                                                                                                                                                                                                                                                                                                                                                                                                                                                                                                                                                                                                                                                                                                                                                                                                                                                                                                                                                                                                                                                                                                                                                                                                                                                                                                                                                                                                                                                                                                                                                                                                                                         |
| Ubiquitin ligases (E3s)             | HECTD4, G2E3, HACE1, HECTD1, HECTD2, HECW1, HERC2, HERC4, HERC6, HUWE1, ITCH, NEDD4, SMURF2, TRIP12, UBE3B, WWP1, WWP2, HERC5, UBE3A, UBE3C, SMURF1, NEDD4L, HECTD3, HERC1, UBE3D, HERC3, TRIP12, HECW2, UBR5, ZNF645, SYVN1, RNF168, BIRC2, CBLB, CNOT4, MARCH7, MSL2, MYLIP, PDZRN3, RAD18, RNF111, RNF125, RNF128, RNF31, RNF6, SIAH2, TRIM24, TRIM28, TRIM5, XIAP, ZNRF2, AMFR, PIAS2, BARD1, BIRC3, BIRC7, BMI1, BRAP, BRCA1, CBL, CBLC, CBLL1, CCNB1IP1, CHFR, DTX1, DTX2, DTX3, DTX3L, RNF7, FANCL, HLTF, RBCK1, TRIM32, LNX1, MARCH1, MARCH11, MARCH2, MARCH3, MARCH4, MARCH6, MARCH8, MARCH9, MDM2, MGRN1, MID1, MID2, MKRN1, MNAT1, MUL1, MYCBP2, NHLRC1, PARK2, PEX10, PEX12, PEX2, PIAS1, PIAS3, PIAS4, PML, RAG1, RBBP6, RBX1, RC3H1, RCHY1, RFFL, RFPL4A, RFWD3, RING1, RNF181, RNF103, RNF11, RNF114, RNF115, RNF121, RNF122, RNF126, RNF13, RNF130, RNF138, RNF139, RNF144B, RNF146, RNF152, RNF167, RNF170, RNF180, RNF182, RNF187, RNF19A, RNF2, RNF213, RNF217, RNF220, RNF34, RNF38, RNF4, RNF40, RNF41, RNF5, RNF8, SH3RF1, SHPRH, SIAH1, TRIM51, TOPORS, TRAF2, TRAF5, TRAF6, TRIM11, TRIM13, TRIM15, TRIM17, TRIM2, TRIM21, TRIM23, TRIM25, TRIM26, TRIM27, TRIM3, TRIM31, TRIM35, TRIM36, TRIM37, TRIM38, TRIM39, TRIM4, TRIM40, TRIM41, TRIM43, TRIM45, TRIM47, TRIM50, TRIM54, TRIM56, TRIM59, TRIM6, TRIM62, TRIM63, TRIM68, TRIM73, TRIM74, TRIM8, TRIM9, TTC3, UHRF1, UHRF2, VPS18, ZNRF1, ZNRF4, BFAR, DZIP3, MDM4, NFX1, PCGF1, PJA1, PJA2, RNF123, RNF133, RNF135, RNF20, RNF25, ZNRF3, LRSAM1, NSMCE2, ZMIZ1, ZMIZ2, NSMCE1, PELI2, PELI1, PELI3, ARIH1, RNF14, RNF19B, RNF216, TRIM46, ZSWIM2, ARIH2, MIB1, TRIM22, MARCH5, RLIM, OSTM1, RNF185, DTX4, TRIM71, NEURL1B, PCGF2, RNF113A, RNF113B, RNF150, RNF186, RNF24, RNF43, RNFT1, TRIM34, TRIM65, VPS41, TRAF3, SH3RF3, LITAF, RNF26, IRF2BP1, LTN1, TRAIIP, MARCH10, MIB2, UBR1, UBR2, TRIM33, UBOX5, CUL9, RFWD2, TRAF7, STUB1, UBE4A, UBE4B, NOSIP, TRAF3IP2, PPIL2, PRPF19, UBR4, HDAC4, RASD2, UFL1, EP300, ZFP91, E4F1, RABGEF1, KAT2B, KCMF1, CBX4, DCUN1D1, DCUN1D3, DCUN1D2, PDLIM2, MAP3K1, AIRE, RWDD3, FUS, RANBP2, STC1, |

|                                 |                                                                                                                                                                                                                                                                                                                                                                                                                                                                                                                                                                                                                                                                                                                                                                                                                                                                                                                                                                                                                                                                                                                                                                                                                                                                                                                                                                                                                                                                                                                                                                                                                                                   |
|---------------------------------|---------------------------------------------------------------------------------------------------------------------------------------------------------------------------------------------------------------------------------------------------------------------------------------------------------------------------------------------------------------------------------------------------------------------------------------------------------------------------------------------------------------------------------------------------------------------------------------------------------------------------------------------------------------------------------------------------------------------------------------------------------------------------------------------------------------------------------------------------------------------------------------------------------------------------------------------------------------------------------------------------------------------------------------------------------------------------------------------------------------------------------------------------------------------------------------------------------------------------------------------------------------------------------------------------------------------------------------------------------------------------------------------------------------------------------------------------------------------------------------------------------------------------------------------------------------------------------------------------------------------------------------------------|
|                                 | <p>MALT1, AURKA, SART1, CREBBP, CRBN, IRF2BPL, CADPS2, RMND5B, KDM2B, TNFAIP3, UCHL1, ANAPC2, CUL4A, CUL5, CUL3, CUL7, CUL1, CUL2, CUL4B, FBXO3, CCNF, FBXO44, FBXL15, FBXL3, FBXO11, FBXO17, FBXO18, FBXO2, FBXO22, FBXO25, FBXO27, FBXO31, FBXO33, FBXO4, FBXO45, FBXO6, FBXO7, FBXO8, FBXW10, FBXO32, FBXO42, FBXL2, FBXL6, FBXL12, FBXW8, FBXL14, FBXL5, FBXL4, SKP2, CDCA3, ZC3HC1, FBXO40, FBXL7, FBXL19, FBXW5, FBXW2, BTRC, FBXW11, FBXW7, TBL1X, TBL1XR1, VHL, MED8, LRRC41, TMF1, ASB1, ASB3, ASB6, ASB8, ASB9, NEURL2, SOCS5, SOCS6, SOCS7, SPSB1, ASB2, ASB4, RAB40C, ASB12, ASB7, SOCS1, SOCS2, SOCS3, SOCS4, SPSB4, CISH, FEM1B, LRR1, ASB15, SPSB2, WSB2, WSB1, CORO7, TCEB1, TCEB2, KLHL42, KLHL12, KLHL17, KLHL8, SPOP, KLHL13, KLHL10, KLHL2, KLHL20, KLHL22, KLHL7, KLHL21, RCBTB1, KBTBD13, KEAP1, KLHL9, KLHL41, GAN, KCTD11, KCTD13, KCTD21, KCTD6, TNFAIP1, ABTB1, BCL6B, RHOBTB1, RHOBTB2, KCTD5, ZBTB18, NACC1, RHOBTB3, VPRBP, DDB2, ERCC8, DTL, GNB2L1, DCAF12, DCAF7, GRWD1, PWP1, WDR53, DCAF4, DCAF5, KATNB1, NUP43, RBBP4, RBBP5, TLE1, TLE2, WDR82, SMU1, WDR26, ATG16L1, CIAO1, DCAF13, DCAF6, EED, GNB2, POC1B, RBBP7, SNRNP40, TLE3, WDR12, WDR5, WDR5B, WDR61, WDR76, DCAF10, DCAF8, WDTC1, PAFAH1B1, BRWD1, NLE1, PHIP, WDR59, AMBRA1, DCAF11, DDB1, TRPC4AP, AHR, HOXB4, RICTOR, DCAF15, DCAF16, DCAF17, ARNT, FZR1, CDC20, CDC27, ANAPC11, ANAPC4, ANAPC5, ANAPC7, ANAPC1, CDC23, ANAPC10, CDC16, CDC26, ANAPC13, AREL1, MAGEA6, MEX3C, MKRN2, MKRN3, MKRN4P, MYC, NEURL1, NEURL3, PDE4D, RNF144A, RNF149, RNF169, SH3RF2, TRIM69, TRIML1, TRIML2, UBE2E3, UBAC1, UBR3, UBR7, UNKL, PRC1, IRAK1, IRAK4</p> |
| Deubiquitinating enzymes (DUBs) | <p>BAP1, UCHL1, UCHL3, UCHL5, ATXN3, ATXN3L, JOSD1, JOSD2, TNFAIP3, ZA20D1, OTUD7A, OTUD4, PARP11, OTUD6A, YOD1, OTUD6B, OTUD5, OTUB1, OTUB2, OTUD1, ZRANB1, VCPIP1, STAMBIP, STAMBPL1, BRCC3, COPS5, COPS6, EIF3S3, EIF3S5, Q7Z3G8, PSMD14, PRPF8 PSMD7, USP1, USP2, USP3, USP4, USP5, USP6, USP7, USP8, USP9X, USP9Y, USP10, USP11, USP12, USP13, USP14, USP15, USP16, USP18, USP19, USP20, USP21, USP22, USP24, USP25, USP26, USP28, USP29, USP30, USP31, USP32, USP33, USP34, USP35, USP36, USP37, USP38, USP39, USP40, USP41, USP42, USP44, USP45, USP46, USP47, USP48, USP49, USP50, USP51, USP52, USP54, USP43, CYLD</p>                                                                                                                                                                                                                                                                                                                                                                                                                                                                                                                                                                                                                                                                                                                                                                                                                                                                                                                                                                                                                   |
| Proteasome                      | <p>IFNG, POMP, PSMA1, PSMA2, PSMA3, PSMA4, PSMA5, PSMA6, PSMA6P4, PSMA7, PSMA8, PSMB1, PSMB10, PSMB11, PSMB2, PSMB3, PSMB4, PSMB5, PSMB6, PSMB7, PSMB8, PSMB9, PSMC1, PSMC1P4, PSMC2, PSMC3, PSMC4, PSMC5, PSMC6, PSMD1, PSMD11, PSMD12, PSMD13, PSMD14, PSMD2, PSMD3, PSMD4, PSMD6, PSMD7, PSMD8, PSME1, PSME2, PSME3, PSME4, PSMF1, SEM1</p>                                                                                                                                                                                                                                                                                                                                                                                                                                                                                                                                                                                                                                                                                                                                                                                                                                                                                                                                                                                                                                                                                                                                                                                                                                                                                                    |

**Table S2.** Functional enrichment of the differentially expressed UPSs

| Ca | ID         | Description                                                       | pv  | geneID                                          |
|----|------------|-------------------------------------------------------------------|-----|-------------------------------------------------|
| te |            |                                                                   | alu |                                                 |
| go |            |                                                                   | e   |                                                 |
| ry |            |                                                                   |     |                                                 |
| G  | GO: 000020 | protein polyubiquitination                                        | 2.0 | WSB1/RBCK1/TNFAIP3/PSMB10/DTL/PSMB8/PSMB9/HEC   |
| O  | 000        |                                                                   | 7E  | W1/AREL1/PSMA8/TRAF2/NEDD4L/DDB2/TRIM36/SPSB1/P |
| -  | 020        |                                                                   | -   | ELI2/UBE2C/TRIM2/CHFR/AMFR/FBXO17/HECW2/FBXO2/R |
| BP | 9          |                                                                   | 23  | NF152                                           |
| G  | GO: 000316 | proteasome-mediated ubiquitin-dependent protein catabolic process | 1.3 | DCAF11/RBCK1/PSMB10/RACK1/PML/PSMB8/PSMB9/HEC   |
| O  | 004        |                                                                   | 4E  | W1/CDC20/AREL1/KCTD13/PSMA8/TRIM9/NEDD4L/SPSB1  |
| -  | 316        |                                                                   | -   | /UCHL1/UBE2C/TRIM2/CHFR/AMFR/USP44/FBXO17/FBXL6 |
| BP | 1          |                                                                   | 21  | /HECW2/FBXO2                                    |
| G  | GO: 000049 | proteasomal protein catabolic process                             | 3.1 | DCAF11/RBCK1/PSMB10/RACK1/PML/PSMB8/PSMB9/HEC   |
| O  | 001        |                                                                   | 4E  | W1/CDC20/AREL1/KCTD13/PSMA8/TRIM9/NEDD4L/SPSB1  |
| -  | 049        |                                                                   | -   | /UCHL1/UBE2C/TRIM2/CHFR/AMFR/USP44/FBXO17/FBXL6 |
| BP | 8          |                                                                   | 20  | /HECW2/FBXO2                                    |
| G  | GO: 000657 | protein deubiquitination                                          | 4.0 | USP2/TNFAIP3/PSMB10/PSMB8/PSMB9/CDC20/PSMA8/TR  |
| O  | 001        |                                                                   | 3E  | AF2/BRCC3/USP46/BIRC3/DDB2/USP41/UCHL1/USP44/MD |
| -  | 657        |                                                                   | -   | M4/MYC/STAMBPL1                                 |
| BP | 9          |                                                                   | 16  |                                                 |
| G  | GO: 000064 | protein modification by small protein removal                     | 1.0 | USP2/TNFAIP3/PSMB10/PSMB8/PSMB9/CDC20/PSMA8/TR  |
| O  | 007        |                                                                   | 6E  | AF2/BRCC3/USP46/BIRC3/DDB2/USP41/UCHL1/USP44/MD |
| -  | 064        |                                                                   | -   | M4/MYC/STAMBPL1                                 |
| BP | 6          |                                                                   | 15  |                                                 |
| G  | GO: 000368 | post-translational protein modification                           | 3.9 | DCAF11/ASB9/WSB1/PSMB10/LRRC41/ASB2/DTL/PSMB8/P |
| O  | 004        |                                                                   | 9E  | SMB9/PSMA8/KLHL21/DDB2/SPSB1/KLHL13/FBXO17/FBX  |
| -  | 368        |                                                                   | -   | O2/ASB15                                        |
| BP | 7          |                                                                   | 13  |                                                 |
| G  | GO: 000217 | regulation of protein catabolic process                           | 1.4 | ASB9/TNFAIP3/RACK1/PML/DTL/IFNG/HECW1/AREL1/NED |
| O  | 004        |                                                                   | 7E  | D4L/CHFR/MDM4/HECW2/TRIM40                      |
| -  | 217        |                                                                   | -   |                                                 |
| BP | 6          |                                                                   | 08  |                                                 |
| G  | GO: 000573 | positive regulation of protein catabolic                          | 4.1 | ASB9/TNFAIP3/RACK1/DTL/IFNG/HECW1/AREL1/NEDD4L/ |
| O  | 004        |                                                                   | 8E  | CHFR/HECW2                                      |
| -  | 573        |                                                                   | -   |                                                 |
| BP | 2          |                                                                   | 08  |                                                 |

---

|    |     |            |     |                                                 |
|----|-----|------------|-----|-------------------------------------------------|
|    |     | process    |     |                                                 |
| G  | GO: | tumor      | 6.1 | RBCK1/TNFAIP3/PSMB10/RACK1/PSMB8/PSMB9/PSMA8/T  |
| O  | 003 | necrosis   | 2E  | RAF2/BIRC3                                      |
| -  | 320 | factor-    | -   |                                                 |
| BP | 9   | mediated   | 08  |                                                 |
|    |     | signaling  |     |                                                 |
|    |     | pathway    |     |                                                 |
| G  | GO: | SCF-       | 2.3 | PSMB10/PSMB8/PSMB9/PSMA8/FBXO17/FBXL6/FBXO2     |
| O  | 003 | dependen   | 2E  |                                                 |
| -  | 114 | t          | -   |                                                 |
| BP | 6   | proteaso   | 07  |                                                 |
|    |     | mal        |     |                                                 |
|    |     | ubiquitin- |     |                                                 |
|    |     | dependen   |     |                                                 |
|    |     | t protein  |     |                                                 |
|    |     | catabolic  |     |                                                 |
|    |     | process    |     |                                                 |
| G  | GO: | ubiquitin  | 4.2 | DCAF11/RBCK1/ASB2/DTL/CDC20/KCTD13/UBE2L6/KLHL2 |
| O  | 000 | ligase     | 9E  | 1/TRAF2/BRCC3/DDB2/SPSB1/UBE2C/PCGF1/AMFR/KLHL1 |
| -  | 015 | complex    | -   | 3/FBXO17/FBXL6/FBXO2                            |
| C  | 1   |            | 18  |                                                 |
| C  |     |            |     |                                                 |
| G  | GO: | cullin-    | 2.3 | DCAF11/DTL/CDC20/KCTD13/KLHL21/DDB2/SPSB1/UBE2C |
| O  | 003 | RING       | 5E  | /KLHL13/FBXO17/FBXL6/FBXO2                      |
| -  | 146 | ubiquitin  | -   |                                                 |
| C  | 1   | ligase     | 12  |                                                 |
| C  |     | complex    |     |                                                 |
| G  | GO: | proteaso   | 1.2 | PSMB10/PSMB8/PSMB9/PSMA8                        |
| O  | 000 | me core    | 8E  |                                                 |
| -  | 583 | complex    | -   |                                                 |
| C  | 9   |            | 06  |                                                 |
| C  |     |            |     |                                                 |
| G  | GO: | proteaso   | 1.1 | PSMB10/PSMB8/PSMB9                              |
| O  | 001 | me core    | 2E  |                                                 |
| -  | 977 | complex,   | -   |                                                 |
| C  | 4   | beta-      | 05  |                                                 |
| C  |     | subunit    |     |                                                 |
|    |     | complex    |     |                                                 |
| G  | GO: | nuclear    | 3.0 | CDC20/BRCC3/UBE2C/PCGF1                         |
| O  | 000 | ubiquitin  | 3E  |                                                 |
| -  | 015 | ligase     | -   |                                                 |
| C  | 2   | complex    | 05  |                                                 |
| C  |     |            |     |                                                 |
| G  | GO: | proteaso   | 0.0 | PSMB10/PSMB8/PSMB9/PSMA8                        |

---

---

|   |     |            |     |                                                   |
|---|-----|------------|-----|---------------------------------------------------|
| O | 000 | me         | 00  |                                                   |
| - | 050 | complex    | 13  |                                                   |
| C | 2   |            | 73  |                                                   |
| C |     |            | 31  |                                                   |
| G | GO: | SCF        | 0.0 | SPSB1/FBXO17/FBXL6/FBXO2                          |
| O | 001 | ubiquitin  | 00  |                                                   |
| - | 900 | ligase     | 14  |                                                   |
| C | 5   | complex    | 60  |                                                   |
| C |     |            | 25  |                                                   |
| G | GO: | endopepti  | 0.0 | PSMB10/PSMB8/PSMB9/PSMA8                          |
| O | 190 | dase       | 00  |                                                   |
| - | 536 | complex    | 14  |                                                   |
| C | 9   |            | 60  |                                                   |
| C |     |            | 25  |                                                   |
| G | GO: | Cul4-      | 0.0 | DCAF11/DTL/DDB2                                   |
| O | 008 | RING E3    | 00  |                                                   |
| - | 000 | ubiquitin  | 34  |                                                   |
| C | 8   | ligase     | 56  |                                                   |
| C |     | complex    | 86  |                                                   |
| G | GO: | Cul3-      | 0.0 | KCTD13/KLHL21/KLHL13                              |
| O | 003 | RING       | 00  |                                                   |
| - | 146 | ubiquitin  | 48  |                                                   |
| C | 3   | ligase     | 64  |                                                   |
| C |     | complex    | 37  |                                                   |
| G | GO: | ubiquitin- | 1.4 | BIRC7/RBCK1/TNFAIP3/NEURL3/LNX1/ASB2/DTL/HECW1/   |
| O | 000 | protein    | 6E  | NEURL1B/AREL1/KCTD13/RNF182/UBE2L6/KLHL21/TRAF2/  |
| - | 484 | transferas | -   | TRIM9/BIRC3/NEDD4L/DDB2/TRIM36/PELI2/RNF149/UBE2  |
| M | 2   | e activity | 45  | C/RNF150/TRIM2/CHFR/TRIM59/AMFR/IRF2BPL/CBLC/KLH  |
| F |     |            |     | L13/RNF43/FBXO17/FBXL6/HECW2/UHRF1/PDZRN3/FBXO    |
|   |     |            |     | 2/RNF152/SH3RF3/ZNRF3                             |
| G | GO: | ubiquitin- | 2.1 | BIRC7/RBCK1/TNFAIP3/NEURL3/LNX1/ASB2/DTL/HECW1/   |
| O | 001 | like       | 2E  | NEURL1B/AREL1/KCTD13/RNF182/UBE2L6/KLHL21/TRAF2/  |
| - | 978 | protein    | -   | TRIM9/BIRC3/NEDD4L/DDB2/TRIM36/PELI2/RNF149/UBE2  |
| M | 7   | transferas | 44  | C/RNF150/TRIM2/CHFR/TRIM59/AMFR/IRF2BPL/CBLC/KLH  |
| F |     | e activity |     | L13/RNF43/FBXO17/FBXL6/HECW2/UHRF1/PDZRN3/FBXO    |
|   |     |            |     | 2/RNF152/SH3RF3/ZNRF3                             |
| G | GO: | ubiquitin  | 6.7 | BIRC7/NEURL3/ASB2/HECW1/NEURL1B/AREL1/BIRC3/NED   |
| O | 006 | protein    | 3E  | D4L/PELI2/RNF149/RNF150/TRIM2/CHFR/TRIM59/AMFR/IR |
| - | 163 | ligase     | -   | F2BPL/CBLC/RNF43/FBXO17/FBXL6/HECW2/UHRF1/PDZR    |
| M | 0   | activity   | 31  | N3/FBXO2/RNF152/SH3RF3/ZNRF3                      |
| F |     |            |     |                                                   |
| G | GO: | ubiquitin- | 2.0 | BIRC7/NEURL3/ASB2/HECW1/NEURL1B/AREL1/BIRC3/NED   |
| O | 006 | like       | 5E  | D4L/PELI2/RNF149/RNF150/TRIM2/CHFR/TRIM59/AMFR/IR |
| - | 165 | protein    | -   | F2BPL/CBLC/RNF43/FBXO17/FBXL6/HECW2/UHRF1/PDZR    |

---

---

|    |     |             |     |                                                 |
|----|-----|-------------|-----|-------------------------------------------------|
| M  | 9   | ligase      | 30  | N3/FBXO2/RNF152/SH3RF3/ZNRF3                    |
| F  |     | activity    |     |                                                 |
| G  | GO: | thiol-      | 4.5 | USP2/TNFAIP3/BRCC3/USP46/USP41/UCHL1/USP44/STAM |
| O  | 000 | dependen    | 7E  | BPL1                                            |
| -  | 484 | t           | -   |                                                 |
| M  | 3   | ubiquitin-  | 08  |                                                 |
| F  |     | specific    |     |                                                 |
|    |     | protease    |     |                                                 |
|    |     | activity    |     |                                                 |
| G  | GO: | thiol-      | 8.0 | USP2/TNFAIP3/BRCC3/USP46/USP41/UCHL1/USP44/STAM |
| O  | 003 | dependen    | 9E  | BPL1                                            |
| -  | 645 | t           | -   |                                                 |
| M  | 9   | ubiquitinyl | 08  |                                                 |
| F  |     | hydrolase   |     |                                                 |
|    |     | activity    |     |                                                 |
| G  | GO: | ubiquitinyl | 8.0 | USP2/TNFAIP3/BRCC3/USP46/USP41/UCHL1/USP44/STAM |
| O  | 010 | hydrolase   | 9E  | BPL1                                            |
| -  | 100 | activity    | -   |                                                 |
| M  | 5   |             | 08  |                                                 |
| F  |     |             |     |                                                 |
| G  | GO: | ubiquitin-  | 1.4 | USP2/TNFAIP3/BRCC3/USP46/USP41/UCHL1/USP44/STAM |
| O  | 001 | like        | 6E  | BPL1                                            |
| -  | 978 | protein-    | -   |                                                 |
| M  | 3   | specific    | 07  |                                                 |
| F  |     | protease    |     |                                                 |
|    |     | activity    |     |                                                 |
| G  | GO: | threonine   | 2.9 | PSMB10/PSMB8/PSMB9/PSMA8                        |
| O  | 000 | -type       | 2E  |                                                 |
| -  | 429 | endopepti   | -   |                                                 |
| M  | 8   | dase        | 06  |                                                 |
| F  |     | activity    |     |                                                 |
| G  | GO: | threonine   | 2.9 | PSMB10/PSMB8/PSMB9/PSMA8                        |
| O  | 007 | -type       | 2E  |                                                 |
| -  | 000 | peptidase   | -   |                                                 |
| M  | 3   | activity    | 06  |                                                 |
| F  |     |             |     |                                                 |
| KE | hsa | Ubiquitin   | 2.8 | BIRC7/PML/CDC20/UBE2L6/BIRC3/NEDD4L/DDB2/UBE2C/ |
| G  | 041 | mediated    | 5E  | CBLC/KLHL13/FBXO2                               |
| G  | 20  | proteolysi  | -   |                                                 |
|    |     | s           | 12  |                                                 |
| KE | hsa | Proteaso    | 8.8 | PSMB10/IFNG/PSMB8/PSMB9/PSMA8                   |
| G  | 030 | me          | 2E  |                                                 |
| G  | 50  |             | -   |                                                 |
|    |     |             | 07  |                                                 |

---

---

|    |     |            |     |                                 |
|----|-----|------------|-----|---------------------------------|
| KE | hsa | Small cell | 2.7 | BIRC7/TRAF2/BIRC3/DDB2/MYC      |
| G  | 052 | lung       | 8E  |                                 |
| G  | 22  | cancer     | -   |                                 |
|    |     |            | 05  |                                 |
| KE | hsa | Necroptos  | 0.0 | RBCK1/TNFAIP3/IFNG/TRAF2/BIRC3  |
| G  | 042 | is         | 00  |                                 |
| G  | 17  |            | 37  |                                 |
|    |     |            | 22  |                                 |
|    |     |            | 11  |                                 |
| KE | hsa | IL-17      | 0.0 | TNFAIP3/IFNG/TRAF2/TRAF3IP2     |
| G  | 046 | signaling  | 00  |                                 |
| G  | 57  | pathway    | 49  |                                 |
|    |     |            | 12  |                                 |
|    |     |            | 97  |                                 |
| KE | hsa | NOD-like   | 0.0 | RBCK1/TNFAIP3/TRAF2/BRCC3/BIRC3 |
| G  | 046 | receptor   | 00  |                                 |
| G  | 21  | signaling  | 67  |                                 |
|    |     | pathway    | 40  |                                 |
|    |     |            | 31  |                                 |

---
